# Supplementary material for: Characterisation of weak intramolecular interactions in the topology of the experimental charge density of 2,2â€²-ethynylenedibenzoic acidElectronic Supplementary Information available. See http://www.rsc.org/suppdata/cp/b1/b107249h/
Source: Royal Society of Chemistry journal article supplement (doi:10.1039/b107249h), 2001-10-01
Supplement: tables.pdf [file tables.pdf]

Fractional atomic co-ordinates

| atom  | $x/a$       | $y/b$      | $z/c$        |
|-------|-------------|------------|--------------|
| O(1)  | 0.01932(8)  | 0.38216(7) | 0.05393(12)  |
| O(2)  | -0.10826(8) | 0.44258(7) | -0.13191(12) |
| C(1)  | -0.10587(6) | 0.26669(6) | -0.08362(9)  |
| C(2)  | -0.08085(6) | 0.18295(6) | 0.02177(9)   |
| C(3)  | -0.12199(7) | 0.08753(6) | -0.02639(10) |
| C(4)  | -0.18899(8) | 0.07545(7) | -0.17071(11) |
| C(5)  | -0.21586(8) | 0.15867(8) | -0.27167(11) |
| C(6)  | -0.17363(7) | 0.25338(7) | -0.22814(10) |
| C(7)  | -0.05968(6) | 0.36861(6) | -0.04584(9)  |
| C(10) | -0.02155(7) | 0.18981(5) | 0.17983(10)  |
| H(3)  | -0.10196    | 0.02247    | 0.05211      |
| H(4)  | -0.22040    | 0.00060    | -0.20165     |
| H(5)  | -0.26803    | 0.15057    | -0.38480     |
| H(6)  | -0.19274    | 0.31806    | -0.30762     |
| H(7)  | -0.07287    | 0.50427    | -0.10008     |

Mean-square atomic displacements ( $\text{\AA}^2$ )

|       | $U_{11}$  | $U_{22}$  | $U_{33}$  | $U_{12}$   | $U_{13}$   | $U_{23}$   |
|-------|-----------|-----------|-----------|------------|------------|------------|
| O(1)  | 0.0260(4) | 0.0175(4) | 0.0287(4) | -0.0052(3) | -0.0151(3) | 0.0054(3)  |
| O(2)  | 0.0233(4) | 0.0181(4) | 0.0316(4) | -0.0031(3) | -0.0124(3) | 0.0076(3)  |
| C(1)  | 0.0153(3) | 0.0169(3) | 0.0148(3) | -0.0016(2) | -0.0038(2) | 0.0013(2)  |
| C(2)  | 0.0167(3) | 0.0149(3) | 0.0145(3) | -0.0010(2) | -0.0032(2) | -0.0009(2) |
| C(3)  | 0.0234(3) | 0.0165(3) | 0.0197(3) | -0.0028(3) | -0.0034(3) | -0.0027(3) |
| C(4)  | 0.0262(4) | 0.0230(4) | 0.0214(4) | -0.0062(3) | -0.0047(3) | -0.0064(3) |
| C(5)  | 0.0247(4) | 0.0303(4) | 0.0180(3) | -0.0064(3) | -0.0072(3) | -0.0030(3) |
| C(6)  | 0.0200(3) | 0.0251(4) | 0.0167(3) | -0.0037(3) | -0.0063(2) | 0.0017(3)  |
| C(7)  | 0.0164(3) | 0.0163(3) | 0.0176(3) | -0.0022(2) | -0.0042(2) | 0.0030(2)  |
| C(10) | 0.0205(3) | 0.0152(3) | 0.0157(3) | -0.0003(2) | -0.0057(2) | 0.0000(2)  |

## Multipole Population Coefficients ( $\text{\AA}^2$ )

| atom  | $P_v$    | $P_{00}$ | $P_{11}$  | $P_{1-1}$ | $P_{10}$  |
|-------|----------|----------|-----------|-----------|-----------|
| O(1)  | 6.37( 6) | -        | -0.06( 2) | -0.04( 2) | -0.05( 3) |
| O(2)  | 6.45( 6) | -        | 0.00( 2)  | 0.02( 3)  | 0.04( 3)  |
| C(1)  | 3.84( 5) | -        | 0.04( 2)  | 0.01( 3)  | -0.04( 3) |
| C(2)  | 4.03( 5) | -        | 0.01( 2)  | 0.06( 3)  | -0.03( 3) |
| C(3)  | 4.10( 5) | -        | -0.03( 2) | 0.00( 3)  | -0.06( 3) |
| C(4)  | 4.06( 5) | -        | 0.02( 3)  | 0.05( 4)  | -0.03( 4) |
| C(5)  | 4.04( 6) | -        | 0.04( 3)  | 0.05( 3)  | -0.01( 4) |
| C(6)  | 4.07( 5) | -        | -0.01( 2) | -0.01( 3) | -0.04( 4) |
| C(7)  | 4.00( 6) | -        | 0.00( 2)  | 0.16( 4)  | -0.03( 3) |
| C(10) | 4.14( 5) | -        | 0.00( 4)  | -0.05( 2) | -0.14( 2) |
| H(3)  | 0.79( 3) | -        | -         | -         | 0.12( 2)  |
| H(4)  | 0.81( 3) | -        | -         | -         | 0.17( 2)  |
| H(5)  | 0.79( 3) | -        | -         | -         | 0.16( 2)  |
| H(6)  | 0.78( 3) | -        | -         | -         | 0.14( 2)  |
| H(7)  | 0.72( 4) | -        | 0.00( 2)  | 0.04( 2)  | 0.05( 3)  |

| atom  | $P_{20}$  | $P_{21}$  | $P_{2-1}$ | $P_{22}$  | $P_{2-2}$ |
|-------|-----------|-----------|-----------|-----------|-----------|
| O(1)  | 0.00( 3)  | -0.05( 2) | 0.03( 2)  | -0.11( 2) | 0.07( 2)  |
| O(2)  | -0.01( 3) | 0.00( 2)  | -0.04( 2) | -0.07( 2) | 0.02( 2)  |
| C(1)  | 0.08( 3)  | -0.02( 2) | 0.00( 3)  | -0.22( 2) | -0.02( 2) |
| C(2)  | 0.09( 3)  | 0.00( 2)  | 0.00( 3)  | -0.24( 2) | 0.01( 2)  |
| C(3)  | 0.10( 3)  | 0.02( 2)  | 0.02( 3)  | -0.22( 2) | 0.01( 2)  |
| C(4)  | 0.19( 3)  | 0.01( 3)  | -0.01( 3) | -0.22( 3) | 0.02( 2)  |
| C(5)  | 0.15( 3)  | -0.02( 3) | 0.02( 3)  | -0.22( 3) | 0.04( 2)  |
| C(6)  | 0.16( 3)  | -0.04( 3) | -0.01( 3) | -0.24( 2) | 0.02( 2)  |
| C(7)  | 0.20( 3)  | -0.02( 2) | -0.09( 3) | -0.24( 3) | 0.00( 2)  |
| C(10) | 0.34( 2)  | -0.02( 3) | 0.02( 2)  | -0.02( 2) | 0.00( 2)  |

| atom  | $P_{30}$ | $P_{31}$  | $P_{3-1}$ | $P_{32}$  | $P_{3-2}$ | $P_{33}$  | $P_{3-3}$ |
|-------|----------|-----------|-----------|-----------|-----------|-----------|-----------|
| O(1)  | 0.01( 2) | 0.00( 2)  | 0.00( 2)  | 0.05( 2)  | -0.02( 2) | -0.03( 1) | 0.00( 1)  |
| O(2)  | 0.09( 2) | -0.01( 2) | -0.04( 2) | 0.09( 2)  | -0.02( 1) | 0.01( 1)  | -0.01( 2) |
| C(1)  | 0.27( 3) | -0.01( 2) | 0.00( 4)  | 0.19( 2)  | 0.00( 3)  | -0.02( 2) | -0.03( 2) |
| C(2)  | 0.34( 3) | 0.02( 2)  | -0.08( 4) | 0.25( 2)  | 0.01( 3)  | -0.01( 2) | -0.01( 2) |
| C(3)  | 0.28( 3) | 0.00( 2)  | 0.03( 3)  | 0.20( 2)  | -0.02( 2) | 0.01( 2)  | 0.03( 2)  |
| C(4)  | 0.25( 3) | 0.01( 2)  | 0.02( 3)  | 0.22( 3)  | 0.01( 3)  | -0.01( 2) | -0.03( 2) |
| C(5)  | 0.25( 3) | -0.02( 3) | 0.05( 3)  | 0.26( 3)  | -0.04( 2) | -0.03( 2) | -0.03( 2) |
| C(6)  | 0.29( 3) | -0.02( 2) | 0.01( 3)  | 0.26( 3)  | -0.02( 2) | -0.01( 2) | 0.00( 2)  |
| C(7)  | 0.44( 3) | -0.03( 2) | 0.04( 4)  | 0.25( 3)  | -0.01( 3) | -0.03( 2) | 0.00( 2)  |
| C(10) | 0.04( 2) | 0.01( 3)  | 0.02( 3)  | -0.01( 2) | 0.01( 3)  | -0.01( 2) | 0.02( 2)  |

## Kappa Parameters

| $\kappa$ set | $\kappa'$ | $\kappa''$ |
|--------------|-----------|------------|
| O            | 0.980(4)  | 0.81(6)    |
| C            | 1.006(6)  | 0.84(1)    |
| H            | 1.16      | 1.16       |
